# Supplementary material for: Identification and Functional Characterization of a Soybean (Glycine max) Thioesterase that Acts on Intermediates of Fatty Acid Biosynthesis
Source: MDPI journal article supplement (doi:10.3390/plants8100397), 2019-10-08
Supplement: s1 [file s1]

**Supplementary File 2.** Synthetic oligonucleotide used in this study. Start codons and stop codons are in bold. Restriction sites on primers are underlined. A brief description of what each primer was used for is provided.

| Primer name                                                                                             | Primer sequence (5'-3')                | Brief description                                                                                                                                        |
|---------------------------------------------------------------------------------------------------------|----------------------------------------|----------------------------------------------------------------------------------------------------------------------------------------------------------|
| <b>Isolation of <i>GmMKS2</i> promoter region</b>                                                       |                                        |                                                                                                                                                          |
| Promoter-<br><i>GmMKS2</i> -F                                                                           | CTTGATGTTGGCGAATGC                     | Forward primer located in the 5'UTR of <i>GmMKS2</i> gene                                                                                                |
| Promoter-<br><i>GmMKS2</i> -R                                                                           | CAACGGCGAAACTGATCG                     | Reverse primer located in the first exon of <i>GmMKS2</i> gene                                                                                           |
| <b>Detection of <i>GmMKS2</i> alternative splicing variants (<i>GmMKS2</i>-X1 and <i>GmMKS2</i>-X3)</b> |                                        |                                                                                                                                                          |
| <i>GmMKS2</i> -Met-F                                                                                    | <u>CCATGGATG</u> AGCTACAACCACA<br>CTTC | Forward primer located in the first exon of <i>GmMKS2</i> gene                                                                                           |
| <i>GmMKS2</i> -45nt-R                                                                                   | CTGGTTGCATGTTCTTATTATG                 | Reverse primer located in the last 45 nucleotides of intron 3.                                                                                           |
| <b>Isolation of <i>GmMKS2</i> transcripts</b>                                                           |                                        |                                                                                                                                                          |
| <i>GmMKS2</i> -5'UTR-<br>F                                                                              | AGGCAAAGGTCGTTGAG                      | Forward primer for amplifying full-length <i>GmMKS2</i> -X1, <i>GmMKS2</i> -X2, and <i>GmMKS2</i> -X3 variants as well as <i>GmMKS2</i> genomic sequence |
| <i>GmMKS2</i> -3'-<br>UTR-R                                                                             | GTTACCTCCTTCCTCACTCAC                  | Reverse primer for amplifying full-length <i>GmMKS2</i> -X1, <i>GmMKS2</i> -X2, and <i>GmMKS2</i> -X3 variants as well as <i>GmMKS2</i> genomic sequence |
| <b>Real-time PCR analysis</b>                                                                           |                                        |                                                                                                                                                          |
| <i>GmMKS2</i> -X1-qF                                                                                    | GTATTAATTGCGATGCTGTG                   | Forward primer for <i>GmMKS2</i> -X1 qPCR                                                                                                                |

|                                       |                                               |                                                                                                  |
|---------------------------------------|-----------------------------------------------|--------------------------------------------------------------------------------------------------|
| GmMKS2-X1-qR                          | CAAATTTGTCTCCACTTCTTAG                        | Reverse primer for <i>GmMKS2-X1</i> qPCR                                                         |
| GmMKS2-X2-qF                          | ATTGGTATTAATTGCGATGCTG                        | Forward primer for <i>GmMKS2-X2</i> qPCR                                                         |
| GmMKS2-X2-qR                          | GAGAACAAATATTGGAACAG<br>AATC                  | Reverse primer for <i>GmMKS2-X2</i> qPCR                                                         |
| GmMKS2-X3-qF                          | TAGTTATTGCCAGCACGGTCG                         | Forward primer for <i>GmMKS2-X3</i> qPCR                                                         |
| GmMKS2-X3-qR                          | GACAAGCAAAATTGGAGAGGC                         | Reverse primer for <i>GmMKS2-X3</i> qPCR                                                         |
| cons6-qF                              | CTTTTACATTTATACCCGGCAGA<br>TTG                | Forward primer for <i>cons6</i> qPCR                                                             |
| cons6-qR                              | CCCATCCAGAATCAAAATCAGA<br>AT                  | Reverse primer for <i>cons6</i> qPCR                                                             |
| <b>Recombinant protein expression</b> |                                               |                                                                                                  |
| <i>Nde</i> I-GmMKS2-X1/X2/X3-sf-F     | <u>CATATG</u> AGTGGATTCCATGAC                 | Forward primer for amplifying the region encoding the mature GmMKS2-X1, GmMKS2-X2, and GmMKS2-X3 |
| <i>Xho</i> I-GmMKS2-X1/X2-sf-R        | <u>CTCGAGT</u> TAAGAGTCCTCAATTC               | Reverse primer for amplifying the region encoding the mature GmMKS2-X1 and GmMKS2-X2             |
| <i>Xho</i> I-GmMKS2-X3-sf-R           | <u>CTCGAGT</u> TAGTGTACTAAAATGT<br>ATAAGGAGGT | Reverse primer for amplifying the region encoding the mature GmMKS2-X3                           |
