# Supplementary material for: Identification and Functional Characterization of a Soybean (Glycine max) Thioesterase that Acts on Intermediates of Fatty Acid Biosynthesis
Source: MDPI journal article supplement (doi:10.3390/plants8100397), 2019-10-08
Supplement: s1 [file s1]

**Supplementary File 1.** Nucleotide sequence of *GmMKS2* obtained by PCR and verified by sequencing. Shown here are 1105 nucleotides upstream of the translation start codon (ATG), five exons, and four introns. The boxed nucleotide located at -106 bp upstream of the initiating codon ATG was predicted to be the transcription start site (A<sub>+</sub>). The putative promoter region spanning from -1000 to +101 relative to the transcription start site is highlighted in grey. Start and stop codons are in bold. Exons are underlined.

GAAGTGTAGCATCTTTCAACGTTTATAGGAAACACTTAACACATGATTATGTCATCATTCTTAA  
ACAAATTCATCTGTGTAACAAATGCTTCCACGTGTTTCATCTGGGTCCAAGAGTCCATCGTAAA  
GATCTATGGTCAACATCTTCCATTCTGGGCGGGAGTTGTGCTTCATAATACCATCAATAAAGG  
GATAAAGTCGATTTTTGGCATTGTGTGCTCTTGGGGTTGGTTGTGTGATAGAGGGAGTTCCTTC  
TCTCCATGTCGTGTTAGCCTCCTCAGTCCTGGTTGCATTATGGTCTTCGTGAAGCTTCAGGTAC  
TGGTCCTTAAGGGTGGCATTTCCTTTAGAGGTTCTCCATTTCTTGTGCGTTGTTTCACTTGAGC  
ATGTTTCATCTCTTTTGCATGGCCACTATCATAGCATGATCATCGAGCTCCTGATGCAGGATAT  
TCTCCCATTCATTGGGTTCCCTTCTTTAGCGACTCCCATGACAGGCATTTTCAAGCATGGTGA  
ATGCTTGTCCCAGTTGTTGATTCCATGATAGGCAACATTGGTGTGTCACCATTACAAACCAT  
TGATAATGTAGTGGTCAAAGGAGAAGATTGCCTTCAGACCCACAGTAGGCACCAAATATTC  
TTACCGGATTTGGCAGAACTTGCTCACAATGATAATATATGTTTTTAGAGGTTACATCTATCTT  
TCTTATAGAAGATAGAGCTTTCATATTACCTTAATTATACTCTAGATCCGAGTAGCCTGTTCTGA  
TTGGCTAGTGAATACATAGGCTTGTTGAGTCGAAATAGTACAATTTATTATAAAATTTTGTTAT  
ATAATTCTATATTAGTTCTTTTTAAATGATTATAAAAAGAAATTATTCAAGAGTGATATCTATT  
ACCAACATTTTCGTTGATGTGAGATTGTTTTAGAAAATTTGAAATTTGAAGTTTATGAATGAA  
AAAAAAAGTGATACTAAAAAAAAGCAAAACAAATTAGGTATTC<sup>A</sup>AAAAATTTGCTAGGCA  
AAGGTCGTTGAGGTTGAGGAAAAAAAAGTATAATAGCAGTAGCATGGGTTGTAACGCCTATA  
ATCATAATCCCGTTGTAGTTCCAAAAA**ATG**AGCTACAACCACACTTCCTCGATGTCATTGCCT  
TCCCCATTGTACCTGAATACTACGTCGTTTCGCCTCACGCGCCAATCTCCTTTTCCTTTTCCCCG  
CCGGCGCTTCAATCCACCGGCTTCCGATCAGTTTCGCCGTTGAGTTCCAGCCCCTCTGCATCA  
CTCTTCGATCTCAGAGGGGGCAAAGGTAATTCCTCACACAACCCTTGTTTGTGCAATCGAT  
TCCGTAAATTTGTTGCCTTTTCATGTGATTGGAATCGAGCATCTCTTTTTTAAATTCGTGATTA

ATTTATTCTATATATAATAATATTCTTCTTACAATTTATAACAGAAATGAGTGGATTCCATGACG  
TTGAACTGAAGGTGCGCGACTATGAGTTGGATCAGTACGGTGTGGTTAACAATGCAGTTTATG  
CTAGTTATTGCCAGCACGGTGAGACCTCTTGAGCTGGTTCTTACTGTTGCTTGCTTGCTTAAAT  
CAATGTTTCCCTTTTACTGGTAATGTCGTATGTGTATATATTTCTCTTGTAATAGATGTTAATTT  
TGAAATGTTTATAACTCCAAATGAGCACTAAGTTTTGACATGGAATAATTGTCGACAATAGTT  
ATGCCATGAGTTAGCAATTTTAACAACAGTTATTGTCTGCTTTTCTAGGTATATCAAAATTGTA  
ATCTTTGATATCTTAGTCCTTTTGTTTATGCTACAAAATTATATTTTGATTTATGTTCTTTAAAC  
TTCAAATTGAATTTAGATTCGACATATTTTAGAGTATAAAAAAATTATGAAGGTAAAACAAC  
ATAATCAGACTAGCACAGACATATGATAAAAGTTTTATAATCTTCTCTTTTCCTTATAAA  
ACAAATGTATAGGCTGTGATAGTAATATTATGAAGGGATTTTATGGGAAAACATTCTGAACA  
TAGTTGGAAATGAAACAAAAGAGCAAGAAGTAAAGGAATCAGATCATAATTTTAAACAAA  
TACTGCTGTTTCCCGGTAAAACCATTAGAAGGCTCACATGTAGTTTTATTGAAGCATATTCCCC  
AGATTAGCATCTTCTGAAAGAACAATTCTCAATGTTAGTATGCAAGATAAAGTACAGTATAC  
TTCATATGCAGAAAGCTGTACACTTTGTGAGGAATGAACTTTCATACATACATATGAACATT  
TGTTAGTCTATATGAAAATATAAAATAGGCAATTGAGAAGGAGAAAGAACAATACAGAAAA  
TATAGTGTTAGGATCCTGAAAAAATAATTAATCAGAATGGATAAAATGGACAAACAACAGA  
GAATCTGGCATCTGTGTTTAGTATTACTAACTCCAGAATAGTGATTCTGGCTTCTGAGTATTC  
TTGGAATGCAAGAATGACAGAACGAGAAAAAAAACAGAAAAGAAATGACTCATTCCAAGC  
ATTGGTTTGGAAGTTCCCTATCCAAGCATTTAATTCATCAATTGGGAAGAAATACCCTGTGGA  
GCCTGACTCAACGAGTATTGCCAATGCAAGGCTATTTGTAGTATGGAACTGAGTGATGTCTAC  
ACGAATAATCCTTTAGTCATACCAATATTCCACCGCCTTCTTCACCCCTTACTCGTTAAAATAA  
AACTACATTAGGATTTTGCAGGTTACATCAAACTTTTCTATTCAAATTTAGATGAAATCTA  
ATGGTTCATCTCACTGATAAGTTCTATTTGTTTCTCTAAGAGTTGTGTATAGTATTTTTTCTTATC  
TTGTATATGCTTGGAATATTTCCCCCCTTTTCTTGATCTCTGTTTTGGTATATTTGAGCCAGT  
ATAATTGTTATGATCAGGTGGGAAGTTGGTGAGTTCTTATGGTACTTTGGTATTTGTTTTGGTTG  
GGGTCACTTTTCTAATTTATTCCGTTGGACCTGGGATTCGAGTACATGGGAGGTGATTACAAT

GGGTCAATGATGACTATAGTTACTGTGAGGGCAGTTTGGTGGGAGGTATTGTAACCTGGGTTA  
TTTCCTATTTATACTACATTGTTAATGGGGCATAACCTAGCATGGCAGGGTACTGTGCTTTATT  
ACTATGTCTGTATTTTTTGGTGCTTCTGGTACCAAGTATTAATATATTAATTATCTTTTGCTGAT  
AAAAAAAGTTATGATCAGGGTATTGACACTTGACAGGATACTGAATTGAAACGTATTGAGTT  
GAATGGTCTGCAAACCTTTTAAAGTTATCCTTTGTACATTTGTGGCAATTAAAAGGCATGCTTTC  
AATTTTAGATGTATAAACTGATCTATTGCCATATATATTTTCATAAGGTCGTCATGAACTCTTG  
CAAAACATTGGTATTAATTGCGATGCTGTGGCTCGCAGTGGTGATGCATTGGCATTGTCTGAA  
CTATCGCTCAAATTCCTTGACCTCTAAGAGTAAGCCTCTCCAATTTGCTTGTCATTTCTGT  
TTTAGGATATAGTGCAACTGTGCAAATAACCTCCTTATACATTTTAGTACACTAAAAGATATG  
TTTTTCTGTATAAGTTAGTTCTGTTTTCCAATATTTGTTCTCATAATAAGAACATGCAACCAGA  
GTGGAGACAAATTTGTTGTAAGAGTTAGGATTTCTGGCTCTTCAGCTGCTCGTTTATACTTTGA  
TCACTTCATCTATAAGCTGCCAAACCAAGAGGTCTTTCTCCACCACTTGCTGCTTATTGTATTT  
CCATTTTTGAGAATATTTGCTGATATTTGGTGAAATGGTGGCAGCCTATTTTGGAAGCCAAGG  
CCATAGCGGTGTGGCTTGACAAAACTATCGTCCTATACGAATTCCAGCAGAGATGAAGTCT  
AAATTTGTAAAGTTTATTCGAATTGAGGACTCTTA**A**ATTCAGTTACCAGTTGAGTATAGCTTATT  
GGTTAATAGAGCATTAAAGAAAGGTAATTATTTATGTA
