# Supplementary material for: Identification and Functional Characterization of a Soybean (Glycine max) Thioesterase that Acts on Intermediates of Fatty Acid Biosynthesis
Source: MDPI journal article supplement (doi:10.3390/plants8100397), 2019-10-08
Supplement: s1 [file s1]

**Supplementary File 3:** Alignment of GmMKS2-X1, GmMKS2-X2, and GmMKS2-X3 transcript sequences and of protein sequences encoded by these transcripts. (a) Alignment of three *GmMKS2* transcripts. The region of intron 3 inserted between exon 3 and exon 4 to generate *GmMKS2-X1* and *GmMKS2-X3* transcripts are boxed. Stop codons are in bold; (b) Alignment of three GmMKS2 isoforms. Identical residues are shaded in black, and similar residues are shaded in grey.

|           |                                                                     |     |
|-----------|---------------------------------------------------------------------|-----|
| (a)       |                                                                     |     |
| GmMKS2-X2 | ATGAGCTACAACCACACTTCCTCGATGTCATTGCCTTCCCCATTGTACCTGAATACTACG        | 60  |
| GmMKS2-X1 | ATGAGCTACAACCACACTTCCTCGATGTCATTGCCTTCCCCATTGTACCTGAATACTACG        | 60  |
| GmMKS2-X3 | ATGAGCTACAACCACACTTCCTCGATGTCATTGCCTTCCCCATTGTACCTGAATACTACG        | 60  |
| *****     |                                                                     |     |
| GmMKS2-X2 | TCGTTTCGCCTCACGCGCCAATCTCCTTTTCCCTTTTCCCCGCCGCGCTTCAATCCACCG        | 120 |
| GmMKS2-X1 | TCGTTTCGCCTCACGCGCCAATCTCCTTTTCCCTTTTCCCCGCCGCGCTTCAATCCACCG        | 120 |
| GmMKS2-X3 | TCGTTTCGCCTCACGCGCCAATCTCCTTTTCCCTTTTCCCCGCCGCGCTTCAATCCACCG        | 120 |
| *****     |                                                                     |     |
| GmMKS2-X2 | GCTTTCGATCAGTTTCGCCGTTGAGTTCCAGCCCCCTCTGCATCACTCTTCGATCTCAGA        | 180 |
| GmMKS2-X1 | GCTTTCGATCAGTTTCGCCGTTGAGTTCCAGCCCCCTCTGCATCACTCTTCGATCTCAGA        | 180 |
| GmMKS2-X3 | GCTTTCGATCAGTTTCGCCGTTGAGTTCCAGCCCCCTCTGCATCACTCTTCGATCTCAGA        | 180 |
| *****     |                                                                     |     |
| GmMKS2-X2 | GGGGGCAAAGGAATGAGTGGATTCCATGACGTTGAACTGAAGGTGCGCGACTATGAGTTG        | 240 |
| GmMKS2-X1 | GGGGGCAAAGGAATGAGTGGATTCCATGACGTTGAACTGAAGGTGCGCGACTATGAGTTG        | 240 |
| GmMKS2-X3 | GGGGGCAAAGGAATGAGTGGATTCCATGACGTTGAACTGAAGGTGCGCGACTATGAGTTG        | 240 |
| *****     |                                                                     |     |
| GmMKS2-X2 | GATCAGTACGGTGTGGTTAACAATGCAGTTTATGCTAGTTATTGCCAGCACGGTCGTCAT        | 300 |
| GmMKS2-X1 | GATCAGTACGGTGTGGTTAACAATGCAGTTTATGCTAGTTATTGCCAGCACGGTCGTCAT        | 300 |
| GmMKS2-X3 | GATCAGTACGGTGTGGTTAACAATGCAGTTTATGCTAGTTATTGCCAGCACGGTCGTCAT        | 300 |
| *****     |                                                                     |     |
| GmMKS2-X2 | GAACTCTTGCAAAACATTGGTATTAATTGCGATGCTGTGGCTCGCAGTGGTGATGCATTG        | 360 |
| GmMKS2-X1 | GAACTCTTGCAAAACATTGGTATTAATTGCGATGCTGTGGCTCGCAGTGGTGATGCATTG        | 360 |
| GmMKS2-X3 | GAACTCTTGCAAAACATTGGTATTAATTGCGATGCTGTGGCTCGCAGTGGTGATGCATTG        | 360 |
| *****     |                                                                     |     |
| GmMKS2-X2 | GCATTGTCTGAACTATCGCTCAAATTCCTTGACCTCTAAGA-----                      | 402 |
| GmMKS2-X1 | GCATTGTCTGAACTATCGCTCAAATTCCTTGACCTCTAAGA-----                      | 402 |
| GmMKS2-X3 | GCATTGTCTGAACTATCGCTCAAATTCCTTGACCTCTAAGA <b>GTAAGCCTCTCCAATTTT</b> | 420 |
| *****     |                                                                     |     |
| GmMKS2-X2 | -----                                                               | 402 |
| GmMKS2-X1 | -----                                                               | 402 |
| GmMKS2-X3 | <b>GCTTGTCAATTTCTGTTTGTAGGATATAGTGCAACTGTGCAAATAACCTCCTTATACATT</b> | 480 |
| *****     |                                                                     |     |
| GmMKS2-X2 | -----                                                               | 402 |
| GmMKS2-X1 | ----- <b>TTCTGTTTCCAATATTGTTT</b>                                   | 424 |
| GmMKS2-X3 | <b>TTAGTACACTAAAGATATGTTTTTCTGTATAAGTTAGTTCTGTTTCCAATATTGTTT</b>    | 540 |
| *****     |                                                                     |     |
| GmMKS2-X2 | -----AGTGAGACAAATTTGTTGTAAGAGTTAGGATTCTG                            | 439 |
| GmMKS2-X1 | <b>TCATAATAAGAACATGCAACCAG</b> AGTGAGACAAATTTGTTGTAAGAGTTAGGATTCTG  | 484 |
| GmMKS2-X3 | <b>TCATAATAAGAACATGCAACCAG</b> AGTGAGACAAATTTGTTGTAAGAGTTAGGATTCTG  | 600 |
| *****     |                                                                     |     |
| GmMKS2-X2 | GCTCTTCAGCTGCTCGTTTATACTTTGATCACTTCATCTATAAGCTGCCAAACCAAGAGC        | 499 |
| GmMKS2-X1 | GCTCTTCAGCTGCTCGTTTATACTTTGATCACTTCATCTATAAGCTGCCAAACCAAGAGC        | 544 |
| GmMKS2-X3 | GCTCTTCAGCTGCTCGTTTATACTTTGATCACTTCATCTATAAGCTGCCAAACCAAGAGC        | 660 |
| *****     |                                                                     |     |
| GmMKS2-X2 | CTATTTTGAAGCCAAGGCCATAGCGGTGTGGCTTGACAAAACTATCGTCCTATACGAA          | 559 |
| GmMKS2-X1 | CTATTTTGAAGCCAAGGCCATAGCGGTGTGGCTTGACAAAACTATCGTCCTATACGAA          | 604 |
| GmMKS2-X3 | CTATTTTGAAGCCAAGGCCATAGCGGTGTGGCTTGACAAAACTATCGTCCTATACGAA          | 720 |
| *****     |                                                                     |     |
| GmMKS2-X2 | TTCCAGCAGAGATGAAGTCTAAATTTGTAAAGTTTATTCGAATTGAGGACTCT <b>TAA</b>    | 615 |
| GmMKS2-X1 | TTCCAGCAGAGATGAAGTCTAAATTTGTAAAGTTTATTCGAATTGAGGACTCT <b>TAA</b>    | 660 |
| GmMKS2-X3 | TTCCAGCAGAGATGAAGTCTAAATTTGTAAAGTTTATTCGAATTGAGGACTCT <b>TAA</b>    | 776 |
| *****     |                                                                     |     |

(b)

|           |   |                                                              |
|-----------|---|--------------------------------------------------------------|
| GmMKS2-X2 | 1 | MSYNHTSSMSLPSPLYLNTTSFRLTRQSPFPFPRRRFNPPAFRSVSPLSSSPSASLFDLR |
| GmMKS2-X1 | 1 | MSYNHTSSMSLPSPLYLNTTSFRLTRQSPFPFPRRRFNPPAFRSVSPLSSSPSASLFDLR |
| GmMKS2-X3 | 1 | MSYNHTSSMSLPSPLYLNTTSFRLTRQSPFPFPRRRFNPPAFRSVSPLSSSPSASLFDLR |

|           |    |                                                             |
|-----------|----|-------------------------------------------------------------|
| GmMKS2-X2 | 61 | GGKMSGFHDVELKVRDYELDQYGVVNNAVYASYCQHGRHELLQNIGINCDAVARSGDAL |
| GmMKS2-X1 | 61 | GGKMSGFHDVELKVRDYELDQYGVVNNAVYASYCQHGRHELLQNIGINCDAVARSGDAL |
| GmMKS2-X3 | 61 | GGKMSGFHDVELKVRDYELDQYGVVNNAVYASYCQHGRHELLQNIGINCDAVARSGDAL |

|           |     |                                                              |
|-----------|-----|--------------------------------------------------------------|
| GmMKS2-X2 | 121 | ALSELSLKFLAPLR-----SGDKFVVRVRISGSSAARLYFDHFIYKLPNQ           |
| GmMKS2-X1 | 121 | ALSELSLKFLAPLRFCFPIFVLIIRTCNQSGDKFVVRVRISGSSAARLYFDHFIYKLPNQ |
| GmMKS2-X3 | 121 | ALSELSLKFLAPLRV-----SLSNFACHFCILGYSAT-----                   |

|           |     |                                         |
|-----------|-----|-----------------------------------------|
| GmMKS2-X2 | 166 | EPILEAKAIAVWLDKNYRPIRIPAEMKSKFVKFIRIEDS |
| GmMKS2-X1 | 181 | EPILEAKAIAVWLDKNYRPIRIPAEMKSKFVKFIRIEDS |
| GmMKS2-X3 | 153 | ---VQITSLYILVH-----                     |
