# Supplementary material for: Identification and Functional Characterization of a Soybean (Glycine max) Thioesterase that Acts on Intermediates of Fatty Acid Biosynthesis
Source: MDPI journal article supplement (doi:10.3390/plants8100397), 2019-10-08
Supplement: s1 [file s1]

**Supplementary File 6.** Putative *cis*-regulatory elements in the GmMKS2 promoter identified through PLACE database [65-95].

| <i>Cis</i> -acting elements | Sequence     | Location (Strand)                                                                                                                                                    | Putative Function                                                                                                                                                                                      |
|-----------------------------|--------------|----------------------------------------------------------------------------------------------------------------------------------------------------------------------|--------------------------------------------------------------------------------------------------------------------------------------------------------------------------------------------------------|
| AAAG motif                  | AAAG         | -988 (-), -877 (+), -816 (+), -808 (+), -752 (-), -660 (-), -608 (-), -530 (-), -410 (+), -303 (-), -283 (-), -155 (-), -137 (+), -40 (+), -23 (+), +26 (+), +51 (+) | binding site of Dof proteins essential for multiple gene expressions associated with the plant-specific pathway for carbon metabolism [65,66]                                                          |
| T-box                       | AACGTT       | -983 (+/-)                                                                                                                                                           | <i>cis</i> -acting regulatory element involved in the MeJA-responsiveness [42,67]                                                                                                                      |
| ACGT element                | ACGT         | -982 (+/-), -908 (+/-)                                                                                                                                               | <i>cis</i> -acting element involved in plant responses to dehydration [49]                                                                                                                             |
| DPBF core                   | ACACNNG      | -963 (+), -909 (-)                                                                                                                                                   | binding site of bZIP transcription factors involved in the seed-specific and ABA-responsive expression of <i>Dc3</i> gene [68]                                                                         |
| E-box (MYC motif)           | CANNTG       | -962 (+/-), -930 (+/-), -919 (+/-), -909 (+/-), -901 (+/-), -793 (+/-), -627 (+/-), -480 (+/-)                                                                       | MYC recognition site found in the promoters of the dehydration-responsive genes such as <i>rd22</i> [50,69], binding site of ICE1 that regulates the transcription of CBT/DREB1 genes in the cold [70] |
| NGATT motif                 | NGATT        | -958 (+), -803 (+), -473 (+), -359 (+), -239 (+), -146 (+), -88 (+), +51(+), +88 (-), +94(-)                                                                         | <i>cis</i> -acting regulatory element involved in cytokinin responsiveness [71]                                                                                                                        |
| W-box core motif            | (T)TGAC(C/T) | -951 (-), -866 (-), -444 (-), -413 (-)                                                                                                                               | binding site of WRKY transcription factors [72]                                                                                                                                                        |
| ARE                         | AAACAAA      | -939 (+), -17 (+)                                                                                                                                                    | anaerobic responsive element [73]                                                                                                                                                                      |
| Circadian                   | CAANNNA TC   | -936 (+)                                                                                                                                                             | necessary for circadian expression [74]                                                                                                                                                                |
| GARE                        | TAACAAR      | -922 (+)                                                                                                                                                             | gibberellin-responsive element [75]                                                                                                                                                                    |
| G-box                       | CACGTG       | -909 (+/-)                                                                                                                                                           | recognized by the GBF (G-box factors) family of bZIP proteins involved in light responsiveness [76,77]                                                                                                 |
| ABRE-like sequence          | ACG(T/C)G    | -909 (-), -908 (+)                                                                                                                                                   | involved in ABA responsiveness and Ca <sup>2+</sup> regulation [49,78]                                                                                                                                 |

|                                   |                  |                                                                                                                       |                                                                                                                                                    |
|-----------------------------------|------------------|-----------------------------------------------------------------------------------------------------------------------|----------------------------------------------------------------------------------------------------------------------------------------------------|
| EIRE (Box W1)                     | TTGACC           | -867 (-), -414 (-)                                                                                                    | elicitor-responsive element [39,41,72,79]                                                                                                          |
| CARE (CAACTC regulatory elements) | CAACTC           | -843 (-)                                                                                                              | gibberellin-responsive element [80]                                                                                                                |
| CAAT box                          | CAAT             | - 820(+), -543 (-), -453 (-), -428 (-), -338 (+), -237 (-), -196 (+), - 86 (-)                                        | common <i>cis</i> -acting element in promoter and enhancer regions, and essential for optimum transcriptional activity [81]                        |
| SRE                               | TTATCC           | -812 (-)                                                                                                              | sugar-repressive element (SRE) found in the dehydrin gene promoters and in the promoters of genes down-regulated after main stem decapitation [82] |
| GATA-box                          | GATA             | -811 (+), -765 (+), -592 (-), -559 (+), -463 (+), -425 (+), -334 (+), -306 (-), -290 (+), -118 (+), -116 (-), -35 (+) | required for light regulated and tissue specific expression [83]                                                                                   |
| I-box                             | GATAA            | -811 (+)                                                                                                              | Light-responsive element [83]                                                                                                                      |
| DRE core motif                    | (A/G)(T/C)CGAC   | -805 (-)                                                                                                              | binding site for C-repeat binding factors (CBFs), also known as dehydration responsive element (DRE) binding proteins (DREBs) [84]                 |
| CAACA motif                       | CAACA            | -789 (-), -476 (-), -457 (+), -448 (-), -214 (-), -106 (+)                                                            | AP-2 binding <i>motifs</i> [85]                                                                                                                    |
| L-box                             | ACC(A/T)AC C     | -777 (-)                                                                                                              | MYB-binding motif involved in response to elicitor treatment and UV-B irradiation [86]                                                             |
| (CA) <sub>n</sub> element         | CNAACAC          | -737 (-)                                                                                                              | important for embryo- and endosperm-specific transcription [87]                                                                                    |
| SORLIP                            | GCCAC CTCAAGTGA  | -671 (-), -597 (+) -628 (-)                                                                                           | Sequences Over-Represented in Light-Induced Promoters (SORLIPs) [77]                                                                               |
| AG consensus                      | TTWCCWWW WNNGGWW | -664 (+)                                                                                                              | binding consensus sequence for floral homeotic protein AGAMOUS (AG) [88]                                                                           |
| RY repeat                         | CATGCA           | -603 (-)                                                                                                              | found in RY/G box and required for seed specific expression, a binding site for B3 domain transcription factors [87,89]                            |

|                   |                    |                                        |                                                                                                                                                  |
|-------------------|--------------------|----------------------------------------|--------------------------------------------------------------------------------------------------------------------------------------------------|
| CCAAT box         | CCAAT              | -543 (-), -453 (-), -237 (-)           | found in the promoter of certain heat shock protein genes and acts cooperatively with heat-shock elements to increase the promoter activity [90] |
| SEF3 motif        | AACCCA             | -541 (-), +71 (-)                      | binding site of soybean embryo factor 3 (SEF3) [91]                                                                                              |
| MYB-related motif | YAACKG<br>CNGTTR   | -480 (-), +98 (-)<br>-480 (+), +98 (+) | binding site for MYB transcriptional activators involved water stress responsiveness [50,92]                                                     |
| WB box            | TTTGACY            | -414 (-)                               | binding site for WRKY proteins [72,79]                                                                                                           |
| TATA box          | TATAAAT<br>TATATAA | -188 (+)<br>-176 (-), -175 (+)         | core promoter element required for RNA polymerase II to initiate transcription [93]                                                              |
| GT-1 motif        | GAAAAA             | -48 (+), +45 (+)                       | involved in pathogen- and salt-induced expression of <i>CaM-4</i> gene from soybean [94]                                                         |
| Pyrimidine box    | TTTTTCC            | +44 (-)                                | required for GA induction [95]                                                                                                                   |
